# Supplementary material for: Impact of Human Papillomavirus Vaccination on Male Disease: A Systematic Review
Source: MDPI journal article supplement (doi:10.3390/vaccines11061083), 2023-06-09
Supplement: s1 [file s1]

# Impact of Human Papillomavirus Vaccination on Male Disease: A Systematic Review

Catarina Rosado <sup>1</sup>, Ângela Rita Fernandes <sup>1</sup>, Acácio Gonçalves Rodrigues <sup>1,2</sup> and Carmen Lisboa <sup>1,2,3,\*</sup>

<sup>1</sup> Division of Microbiology, Department of Pathology, Faculty of Medicine, University of Porto, 4200-039 Porto, Portugal; up201708379@edu.med.up.pt (C.R.); arfernandes@med.up.pt (Â.R.F.); agr@med.up.pt (A.G.R.)

<sup>2</sup> CINTESIS@RISE, Center of Health Technology and Services Research/Rede de Investigação em Saúde, Faculty of Medicine, University of Porto, 4200-319 Porto, Portugal

<sup>3</sup> Department of Dermatology and Venereology, Centro Hospitalar Universitário São João, 4200-319 Porto, Portugal

\* Correspondence: carlis@med.up.pt

## Supplementary Material S1. Search strategy and study selection criteria

- Search strategy

Original search – 632 results, searched on 29/10/2022

|                                                                                                                                                                                                                                                                                                                                                                                                                                                                                                                                                                                                                                                                                                                                |
|--------------------------------------------------------------------------------------------------------------------------------------------------------------------------------------------------------------------------------------------------------------------------------------------------------------------------------------------------------------------------------------------------------------------------------------------------------------------------------------------------------------------------------------------------------------------------------------------------------------------------------------------------------------------------------------------------------------------------------|
| Web Of Science – 183 results                                                                                                                                                                                                                                                                                                                                                                                                                                                                                                                                                                                                                                                                                                   |
| (ALL=((human papillomavirus OR hpv) AND (vaccine OR vaccination OR immunization) AND (efficacy) AND (male disease OR males disease OR man disease OR men disease) )) NOT DT=(Review) and 2010 or 2011 or 2012 or 2013 or 2014 or 2015 or 2016 or 2017 or 2018 or 2019 or 2020 or 2021 or 2022 (Publication Years)                                                                                                                                                                                                                                                                                                                                                                                                              |
| Scopus - 273 results                                                                                                                                                                                                                                                                                                                                                                                                                                                                                                                                                                                                                                                                                                           |
| ( TITLE-ABS-KEY ( ( human AND papillomavirus OR hpv ) ) AND TITLE-ABS-KEY ( ( vaccine OR vaccination OR immunization ) ) AND TITLE-ABS-KEY ( ( efficacy ) ) AND TITLE-ABS-KEY ( ( male AND disease OR males AND disease OR man AND disease OR men AND disease ) ) ) AND ( EXCLUDE ( DOCTYPE , "re" ) ) AND ( LIMIT-TO ( PUBYEAR , 2022 ) OR LIMIT-TO ( PUBYEAR , 2021 ) OR LIMIT-TO ( PUBYEAR , 2020 ) OR LIMIT-TO ( PUBYEAR , 2019 ) OR LIMIT-TO ( PUBYEAR , 2018 ) OR LIMIT-TO ( PUBYEAR , 2017 ) OR LIMIT-TO ( PUBYEAR , 2016 ) OR LIMIT-TO ( PUBYEAR , 2015 ) OR LIMIT-TO ( PUBYEAR , 2014 ) OR LIMIT-TO ( PUBYEAR , 2013 ) OR LIMIT-TO ( PUBYEAR , 2012 ) OR LIMIT-TO ( PUBYEAR , 2011 ) OR LIMIT-TO ( PUBYEAR , 2010 ) ) |
| MEDLINE (Pubmed) – 176 results                                                                                                                                                                                                                                                                                                                                                                                                                                                                                                                                                                                                                                                                                                 |
| (human papillomavirus OR hpv) AND (vaccine OR vaccination OR immunization) AND (efficacy) AND (male disease OR males disease OR man disease OR men disease) NOT (review[Publication Type]) NOT (case reports[Publication Type]) Filters: from 2010 – 2022                                                                                                                                                                                                                                                                                                                                                                                                                                                                      |
| ((("alphapapillomavirus"[MeSH Terms] OR "alphapapillomavirus"[All Fields] OR ("human"[All Fields] AND "papillomavirus"[All Fields]) OR "human papillomavirus"[All Fields] OR "hpv"[All Fields]) AND ("vaccin"[Supplementary Concept] OR "vaccin"[All Fields] OR "vaccination"[MeSH Terms] OR "vaccination"[All Fields] OR "vaccinable"[All Fields] OR                                                                                                                                                                                                                                                                                                                                                                          |

"vaccinal"[All Fields] OR "vaccinate"[All Fields] OR "vaccinated"[All Fields] OR "vaccinates"[All Fields] OR "vaccinating"[All Fields] OR "vaccinations"[All Fields] OR "vaccination s"[All Fields] OR "vaccinator"[All Fields] OR "vaccinators"[All Fields] OR "vaccine s"[All Fields] OR "vaccined"[All Fields] OR "vaccines"[MeSH Terms] OR "vaccines"[All Fields] OR "vaccine"[All Fields] OR "vaccins"[All Fields] OR ("vaccin"[Supplementary Concept] OR "vaccin"[All Fields] OR "vaccination"[MeSH Terms] OR "vaccination"[All Fields] OR "vaccinable"[All Fields] OR "vaccinal"[All Fields] OR "vaccinate"[All Fields] OR "vaccinated"[All Fields] OR "vaccinates"[All Fields] OR "vaccinating"[All Fields] OR "vaccinations"[All Fields] OR "vaccination s"[All Fields] OR "vaccinator"[All Fields] OR "vaccinators"[All Fields] OR "vaccine s"[All Fields] OR "vaccined"[All Fields] OR "vaccines"[MeSH Terms] OR "vaccines"[All Fields] OR "vaccine"[All Fields] OR "vaccins"[All Fields]) OR ("immune"[All Fields] OR "immuned"[All Fields] OR "immunes"[All Fields] OR "immunisation"[All Fields] OR "vaccination"[MeSH Terms] OR "vaccination"[All Fields] OR "immunization"[All Fields] OR "immunization"[MeSH Terms] OR "immunisations"[All Fields] OR "immunizations"[All Fields] OR "immunise"[All Fields] OR "immunised"[All Fields] OR "immuniser"[All Fields] OR "immunisers"[All Fields] OR "immunising"[All Fields] OR "immunities"[All Fields] OR "immunity"[MeSH Terms] OR "immunity"[All Fields] OR "immunization s"[All Fields] OR "immunize"[All Fields] OR "immunized"[All Fields] OR "immunizer"[All Fields] OR "immunizers"[All Fields] OR "immunizes"[All Fields] OR "immunizing"[All Fields])) AND ("efficacies"[All Fields] OR "efficacious"[All Fields] OR "efficaciously"[All Fields] OR "efficaciousness"[All Fields] OR "efficacy"[All Fields]) AND (((("male"[MeSH Terms] OR "male"[All Fields]) AND ("disease"[MeSH Terms] OR "disease"[All Fields] OR "diseases"[All Fields] OR "disease s"[All Fields] OR "diseased"[All Fields])) OR ((("male"[MeSH Terms] OR "male"[All Fields] OR "males"[All Fields] OR "male s"[All Fields] OR "maleness"[All Fields]) AND ("disease"[MeSH Terms] OR "disease"[All Fields] OR "diseases"[All Fields] OR "disease s"[All Fields] OR "diseased"[All Fields])) OR ((("men"[MeSH Terms] OR "men"[All Fields] OR "man"[All Fields]) AND ("disease"[MeSH Terms] OR "disease"[All Fields] OR "diseases"[All Fields] OR "disease s"[All Fields] OR "diseased"[All Fields])) OR ((("men"[MeSH Terms] OR "men"[All Fields]) AND ("disease"[MeSH Terms] OR "disease"[All Fields] OR "diseases"[All Fields] OR "disease s"[All Fields] OR "diseased"[All Fields])))) NOT "review"[Publication Type] NOT "case reports"[Publication Type] AND (2010:2022[pdat])

#### Additional search on 20/12/2022

Clinical Trials.gov – 65 results

65 Studies found for: HPV Infection | HPV vaccine | Studies with Male Participants | Start date from 01/01/2010 to 12/31/2022

Applied Filters: Male

Note: Condition or disease: HPV infection;

Intervention/treatment: HPV vaccine.

- Study selection criteria*

| Inclusion criteria                                                        | Exclusion criteria                                    |
|---------------------------------------------------------------------------|-------------------------------------------------------|
| Efficacy in males - presence or absence of clinical manifestations of HPV | Efficacy in females                                   |
| All ages                                                                  | Combined treatment (HPV vaccine plus other treatment) |

|                                            |                                                       |
|--------------------------------------------|-------------------------------------------------------|
|                                            |                                                       |
| Men with/without HPV infection at baseline | Cost-effectiveness studies                            |
| HPV vaccine as prevention of disease       | Safety of the HPV vaccine                             |
| HPV vaccine as a treatment for a disease   | Efficacy in males by female vaccination (herd effect) |
| Randomized controlled trials               | Literacy about HPV and the HPV vaccine                |
| Cohorts                                    | Willingness to receive the HPV vaccine                |
| Cross-sectional studies                    | Intralesional use of the HPV vaccine                  |
| To have a placebo or control group         | Non-inferiority studies about the HPV vaccine doses   |
|                                            | Immunogenicity of the HPV vaccine                     |
|                                            | Theoretical/Statistic models                          |
|                                            | Studies about the prevalence of infection             |
|                                            | Studies about the incidence of infection              |
|                                            | Systematic Reviews                                    |
|                                            | Non-randomized controlled trials                      |
|                                            | Reviews                                               |
|                                            | Case reports                                          |
|                                            | Animal studies                                        |

# Impact of Human Papillomavirus Vaccination on Male Disease: A Systematic Review

Catarina Rosado <sup>1</sup>, Ângela Rita Fernandes <sup>1</sup>, Acácio Gonçalves Rodrigues <sup>1,2</sup> and Carmen Lisboa <sup>1,2,3,\*</sup>

<sup>1</sup> Division of Microbiology, Department of Pathology, Faculty of Medicine, University of Porto, 4200-039 Porto, Portugal; up201708379@edu.med.up.pt (C.R.); arfernandes@med.up.pt (Â.R.F.); agr@med.up.pt (A.G.R.)

<sup>2</sup> CINTESIS@RISE, Center of Health Technology and Services Research/Rede de Investigação em Saúde, Faculty of Medicine, University of Porto, 4200-319 Porto, Portugal

<sup>3</sup> Department of Dermatology and Venereology, Centro Hospitalar Universitário São João, 4200-319 Porto, Portugal

\* Correspondence: carlis@med.up.pt

## Supplementary Material S2. Glossary of Nomenclature [30].

---

Anal HPV-related diseases:

|                                                            |                                                                |
|------------------------------------------------------------|----------------------------------------------------------------|
| High-grade anal intraepithelial neoplasia ( <b>HGAIN</b> ) | Anal intraepithelial neoplasia ( <b>AIN</b> ) <b>grade 2 3</b> |
| High squamous intraepithelial lesion ( <b>HSIL</b> )       |                                                                |
| Low squamous intraepithelial lesion ( <b>LSIL</b> )        | Anal intraepithelial neoplasia ( <b>AIN</b> ) <b>grade 1</b>   |

Genital HPV-related diseases:

|                                                              |                                                                  |
|--------------------------------------------------------------|------------------------------------------------------------------|
| High-grade penile intraepithelial neoplasia ( <b>HGPIN</b> ) | Penile intraepithelial neoplasia ( <b>PIN</b> ) <b>grade 2 3</b> |
| High squamous intraepithelial lesion ( <b>HSIL</b> )         |                                                                  |
| Low squamous intraepithelial lesion ( <b>LSIL</b> )          | Penile intraepithelial neoplasia ( <b>PIN</b> ) <b>grade 1</b>   |
